# Supplementary material for: Cocrystal engineering strategy for sustained release and leaching reduction of herbicides: a case study of metamitron
Source: Royal Society of Chemistry journal article supplement (doi:10.1039/d2gc02949a), 2022-01-01
Supplement: d2gc02949a1.pdf [file d2gc02949a1.pdf]

## *Supporting Information*

# Cocrystal Engineering Strategy for Sustained Release and Leaching Reduction of Herbicides: A Case Study of Metamitron

*Yuntian Xiao<sup>a</sup>, Chuanhua Wu<sup>a</sup>, Ling Zhou<sup>a,b,c</sup>, Qiuxiang Yin<sup>a,b,c,\*</sup>, Jingxiang Yang<sup>d,\*</sup>*

<sup>a</sup> *School of Chemical Engineering and Technology, Tianjin University, Tianjin 300072, People's Republic of China.*

<sup>b</sup> *Collaborative Innovation Center of Chemical Science and Engineering (Tianjin), Tianjin 300072, China.*

<sup>c</sup> *State Key Laboratory of Chemical Engineering, Tianjin University, Tianjin 300072, People's Republic of China.*

<sup>d</sup> *State Key Laboratory of Elemento-Organic Chemistry and Department of Chemical Biology, College of Chemistry, Nankai University, Tianjin 300071, China*

## Contents

**Table S1.** Overview of Screening Experiments

**Table S2.** HPLC method parameters for MET

**Table S3.** Physical and chemical parameters of the soil column

**Table S4.** UPLC method parameters for MET

**Table S5.** Hydrogen bond geometrical parameters of cocrystals

**Table S6.** Summary tables of significance analysis of leaching behavior

**Table S7.** Analysis of significant differences between different cocrystal treatment groups

**Table S8.** Relevant properties such as soil pH and CEC after all kinds of herbicides have been applied.

**Figure S1.** Standard curve of MET content (concentration-peak area) determined by HPLC.

**Figure S2.** Schematic diagram of the soil column experiment.

**Figure S3.** Standard curve of MET content (concentration-peak area) determined by UPLC.

**Figure S4.** Supramolecular synthons with similar structures reported in the literature.

**Figure S5.** PXRD pattern of the MET-CA neat grinding product (yellow) compared with MET (blue), CA (orange) and the calculated pattern obtained from the single crystal data (purple).

**Figure S6.** PXRD pattern of the MET-NA neat grinding product (yellow) compared with MET (blue), NA (orange) and the calculated pattern obtained from the single crystal data (purple).

**Figure S7.** PXRD pattern of the MET-BA neat grinding product (yellow) compared with MET (blue), BA (orange) and the calculated pattern obtained from the single crystal data (purple).

**Figure S8.** Confocal Raman micro-spectra of the MET-CA neat grinding product (yellow) compared MET (blue) and CA (orange).

**Figure S9.** Confocal Raman micro-spectra of the MET-NA neat grinding product (yellow) compared MET (blue) and NA (orange).

**Figure S10.** Confocal Raman micro-spectra of the MET-CA neat grinding product (yellow) compared MET (blue) and BA (orange).

**Figure S11.** Comparison of DSC plots of MET (blue) and CA (orange) with the MET-CA cocrystal (yellow).

**Figure S12.** Comparison of DSC plots of MET (blue) and NA (orange) with the MET-NA cocrystal (yellow).

**Figure S13.** Comparison of DSC plots of MET (blue) and BA (orange) with the MET-BA cocrystal (yellow).

**Figure S14.** The TGA traces of MET (blue) and CA (orange) with the MET-CA cocrystal (yellow).

**Figure S15.** The TGA traces of MET (blue) and NA (orange) with the MET-NA cocrystal (yellow).

**Figure S16.** The TGA traces of MET (blue) and BA (orange) with the MET-BA cocrystal (yellow).

**Figure S17.** PXRD patterns of all cocrystals under accelerated storage conditions (40 °C, 75% RH) over 9 weeks. (a) MET-CA, (b) MET-NA, and (c) MET-BA.

**Figure S18.** PXRD patterns of MET and cocrystals after 48h suspension in water at 25 °C.

**Figure S19.** PXRD patterns of MET and cocrystals after 48h suspension in water at 35 °C.

**Figure S20.** PXRD patterns of MET and cocrystals after 48h suspension in water at 45 °C.

**Figure S21.** Dissolution profiles of MET, and three cocrystals in water at 35 °C.

**Figure S22.** Dissolution profiles of MET, and three cocrystals in water at 45 °C.

**Figure S23.** Morphological pictures of Kentucky bluegrass after 14 days of different treatments (data represent germination rate).

## Supporting Tables:

**Table S1.** Overview of Screening Experiments

| Agrichemical name | Coformer name   | Result |
|-------------------|-----------------|--------|
| Metamitron        | Cinnamic acid   | √√     |
| Metamitron        | Ferulic acid    | ×      |
| Metamitron        | Syringic acid   | ×      |
| Metamitron        | Vanillic acid   | ×      |
| Metamitron        | P-coumaric acid | ×      |
| Metamitron        | Hesperetin      | ×      |
| Metamitron        | Gallic acid     | ×      |
| Metamitron        | Salicylic acid  | ×      |
| Metamitron        | Ellagic acid    | ×      |
| Metamitron        | Quercetin       | ×      |
| Metamitron        | Hesperetin      | ×      |
| Metamitron        | Kaempferol      | ×      |
| Metamitron        | Baicalein       | √√     |
| Metamitron        | Resveratrol     | √      |
| Metamitron        | Naringenin      | √√     |
| Metamitron        | Catechins       | ×      |
| Metamitron        | Glycolic acid   | ×      |

√ represents a new cocrystal/salt determined by PXRD; √√ represents a new cocrystal/salt determined by PXRD and its structure is determined by SCXRD; × represents no new cocrystal/salt found by PXRD

**Table S2.** HPLC method parameters for MET

| Parameter                        | Details                                               |
|----------------------------------|-------------------------------------------------------|
| System                           | Agilent 1260 LC                                       |
| Column                           | C18 column (6 $\mu\text{m}$ , 4.6 mm $\times$ 150 mm) |
| Mobile phase                     | Methanol-water (70:30)                                |
| Flow rate                        | 1 mL/min                                              |
| Inject volume                    | 20 $\mu\text{L}$                                      |
| Column temperature               | 25 $^{\circ}\text{C}$                                 |
| Sample temperature               | 25 $^{\circ}\text{C}$                                 |
| $\lambda_{\text{max}}$           | 254 nm                                                |
| Retention time                   | 4.6 min                                               |
| Equation                         | $y = 22311.5587x + 21.10418$                          |
| Regression coefficient ( $R^2$ ) | 0.99999                                               |
| Calibration range                | 0.01 – 0.4 mg/mL                                      |

**Table S3.** Physical and chemical parameters of the soil column

| Properties                                   | Indicators      |
|----------------------------------------------|-----------------|
| Soli particle size (mm)                      | $\leq 2$        |
| Weight (g)                                   | 250             |
| Volumetric weight ( $\text{g}/\text{cm}^3$ ) | $1.29 \pm 0.02$ |
| Loading height (cm)                          | $16.0 \pm 0.3$  |
| Pore volume (mL)                             | $116.2 \pm 3.1$ |
| Flow velocity (mL/min)                       | 1.0             |

**Table S4.** UPLC method parameters for MET

| Parameter                        | Details                                               |
|----------------------------------|-------------------------------------------------------|
| System                           | Waters ACQUITY                                        |
| Column                           | C18 column (6 $\mu\text{m}$ , 4.6 mm $\times$ 150 mm) |
| Mobile phase                     | Methanol-water (70:30)                                |
| Flow rate                        | 1 mL/min                                              |
| Inject volume                    | 20 $\mu\text{L}$                                      |
| Column temperature               | 25 $^{\circ}\text{C}$                                 |
| Sample temperature               | 25 $^{\circ}\text{C}$                                 |
| $\lambda_{\text{max}}$           | 254 nm                                                |
| Retention time                   | 4.2 min                                               |
| Equation                         | $y = 111.1247x + 0.35979$                             |
| Regression coefficient ( $R^2$ ) | 0.99998                                               |
| Calibration range                | 0.1 – 1.0 $\mu\text{g/mL}$                            |

**Table S5.** Hydrogen bond geometrical parameters of cocrystals

| Compound | D–H $\cdots$ A           | d(H $\cdots$ D)/ $\text{\AA}$ | d(H $\cdots$ A)/ $\text{\AA}$ | d(D $\cdots$ A)/ $\text{\AA}$ | $\theta(\text{D–H}\cdots\text{A})/^{\circ}$ | symmetry code          |
|----------|--------------------------|-------------------------------|-------------------------------|-------------------------------|---------------------------------------------|------------------------|
| MET-CA   | N(4)-H(4A) $\cdots$ N(1) | 0.865                         | 2.481                         | 3.121                         | 131.34                                      | $x+1/2, -y+3/2, z+1/2$ |
|          | N(4)-H(4A) $\cdots$ O(3) | 0.865                         | 2.397                         | 3.012                         | 128.51                                      | $x+1/2, -y+3/2, z+1/2$ |
|          | N(4)-H(4B) $\cdots$ O(1) | 0.924                         | 2.209                         | 2.698                         | 112.26                                      | $x-1, y, z$            |
|          | N(4)-H(4B) $\cdots$ O(6) | 0.924                         | 2.453                         | 3.189                         | 136.67                                      | $x+2, y, z+1$          |
|          | O(2)-H(2) $\cdots$ N(2)  | 0.840                         | 1.828                         | 2.656                         | 168.41                                      |                        |

|        |                   |       |       |       |        |                       |
|--------|-------------------|-------|-------|-------|--------|-----------------------|
|        | N(8)-H(8A)···O(3) | 0.860 | 2.291 | 3.037 | 145.12 |                       |
|        | N(8)-H(8A)···O(4) | 0.860 | 2.264 | 2.688 | 110.39 |                       |
|        | O(5)-H(5)···N(6)  | 0.840 | 1.857 | 2.683 | 167.21 |                       |
| MET-NA | N(1)-H(1A)···O(6) | 0.865 | 2.213 | 2.902 | 136.43 | x+1, -y+1, z+1/2      |
|        | N(1)-H(1B)···O(4) | 0.865 | 2.126 | 2.869 | 143.70 | x, y+1, z             |
|        | O(2)-H(2)···N(3)  | 0.840 | 1.811 | 2.632 | 165.37 |                       |
|        | O(3)-H(3)···O(4)  | 0.840 | 1.846 | 2.586 | 146.24 |                       |
|        | O(3)-H(3)···O(6)  | 0.840 | 2.540 | 3.042 | 119.48 | x+1, -y, z+1/2        |
|        | O(6)-H(6)···O(3)  | 0.840 | 1.922 | 2.734 | 162.21 | x-1, y, z-1           |
| MET-BA | N(4)-H(4A)···O(1) | 0.945 | 2.219 | 2.709 | 111.31 |                       |
|        | N(4)-H(4A)···O(3) | 0.945 | 2.376 | 3.223 | 149.00 | -x+3/2, y+1/2, -z+3/2 |
|        | N(4)-H(4B)···O(2) | 0.961 | 2.002 | 2.954 | 170.83 | -x+1/2, y+1/2, -z+3/2 |
|        | O(2)-H(2B)···O(6) | 0.894 | 1.715 | 2.560 | 156.64 |                       |
|        | O(3)-H(3B)···O(1) | 0.891 | 1.976 | 2.782 | 149.56 | -x+3/2, y-1/2, -z+3/2 |
|        | O(3)-H(3B)···O(4) | 0.891 | 2.189 | 2.678 | 113.94 |                       |
|        | O(4)-H(4C)···N(2) | 0.952 | 2.623 | 3.519 | 157.00 |                       |
|        | O(4)-H(4C)···N(1) | 0.952 | 1.725 | 2.673 | 173.54 |                       |

**Table S6.** Summary tables of significance analysis of leaching behavior

MET - CA:

Analysis of variance: one-way analysis of variance

*SUMMARY*

| <i>Groups</i>   | <i>Counts</i> | <i>Sum</i> | <i>Average</i> | <i>Variance</i> |
|-----------------|---------------|------------|----------------|-----------------|
| <i>Column 1</i> | 12            | 1053.86658 | 87.822215      | 437.199827      |



|                 |    |                 |                |                 |
|-----------------|----|-----------------|----------------|-----------------|
|                 |    | 9               | 7              | 4               |
| <i>Column 2</i> | 12 | 850.035210<br>2 | 70.836267<br>5 | 939.498210<br>9 |

*ANOVA*

| <i>Source of Variation</i> | <i>SS</i>       | <i>df</i> | <i>MS</i>      | <i>F</i>        | <b><i>P-value</i></b> | <i>F crit</i> |
|----------------------------|-----------------|-----------|----------------|-----------------|-----------------------|---------------|
| <i>Between Groups</i>      | 1731.13461<br>9 | 1         | 1731.1346<br>2 | 2.51490823<br>9 | <b>0.12704<br/>4</b>  | 4.3009<br>5   |
| <i>With Groups</i>         | 15143.6784<br>2 | 22        | 688.34901<br>9 |                 |                       |               |
| <i>Total</i>               | 16874.8130<br>4 | 23        |                |                 |                       |               |

MET - NA:

Analysis of variance: one-way analysis of variance

*SUMMARY*

| <i>Groups</i>   | <i>Counts</i> | <i>Sum</i> | <i>Average</i> | <i>Variance</i> |
|-----------------|---------------|------------|----------------|-----------------|
| <i>Column 1</i> | 12            | 1053.867   | 87.82222       | 437.1998        |
| <i>Column 2</i> | 12            | 97.84546   | 8.153788       | 43.03884        |

*ANOVA*

| <i>Source of Variation</i> | <i>SS</i> | <i>df</i> | <i>MS</i> | <i>F</i> | <b><i>P-value</i></b> | <i>F crit</i> |
|----------------------------|-----------|-----------|-----------|----------|-----------------------|---------------|
| <i>Between Groups</i>      | 38082.35  | 1         | 38082.35  | 158.5976 | <b>1.56E-11</b>       | 4.30095       |
| <i>With Groups</i>         | 5282.625  | 22        | 240.1193  |          |                       |               |
| <i>Total</i>               | 43364.98  | 23        |           |          |                       |               |

MET - BA:

Analysis of variance: one-way analysis of variance

*SUMMARY*

| <i>Groups</i>   | <i>Counts</i> | <i>Sum</i> | <i>Average</i> | <i>Variance</i> |
|-----------------|---------------|------------|----------------|-----------------|
| <i>Column 1</i> | 12            | 1053.867   | 87.82222       | 437.1998        |
| <i>Column 2</i> | 12            | 165.6016   | 13.80014       | 85.86715        |

*ANOVA*

| <i>Source of Variation</i> | <i>SS</i> | <i>df</i> | <i>MS</i> | <i>F</i> | <i>P-value</i>  | <i>F crit</i> |
|----------------------------|-----------|-----------|-----------|----------|-----------------|---------------|
| <i>Between Groups</i>      | 32875.61  | 1         | 32875.61  | 125.7033 | <b>1.45E-10</b> | 4.30095       |
| <i>With Groups</i>         | 5753.737  | 22        | 261.5335  |          |                 |               |
| <i>Total</i>               | 38629.35  | 23        |           |          |                 |               |

**Table S7.** Analysis of significant differences between different cocystal treatment groups

**Post Hoc Tests**

**Homogeneous Subsets**

Duncan

| treatment | N  | Subset for alpha = 0.05 |         |         |
|-----------|----|-------------------------|---------|---------|
|           |    | 1                       | 2       | 3       |
| MET       | 74 | 3.4789                  | 66.9409 | 82.1775 |
| MET-CA    | 72 | 4.8593                  |         |         |
| MET-BA    | 74 |                         |         |         |
| MET-NA    | 71 |                         |         |         |
| Sig.      |    | 0.823                   | 1.000   | 1.000   |

**Table S8.** Relevant properties such as soil pH and CEC after all kinds of herbicides have been applied.

| Compound | pH        | CEC [mmol/kg] |
|----------|-----------|---------------|
| MET      | 6.95±0.16 | 171±4         |
| MET-CA   | 6.89±0.12 | 182±2         |
| MET-NA   | 7.06±0.01 | 174±11        |
| MET-BA   | 7.04±0.12 | 181±7         |

Supporting Figures:

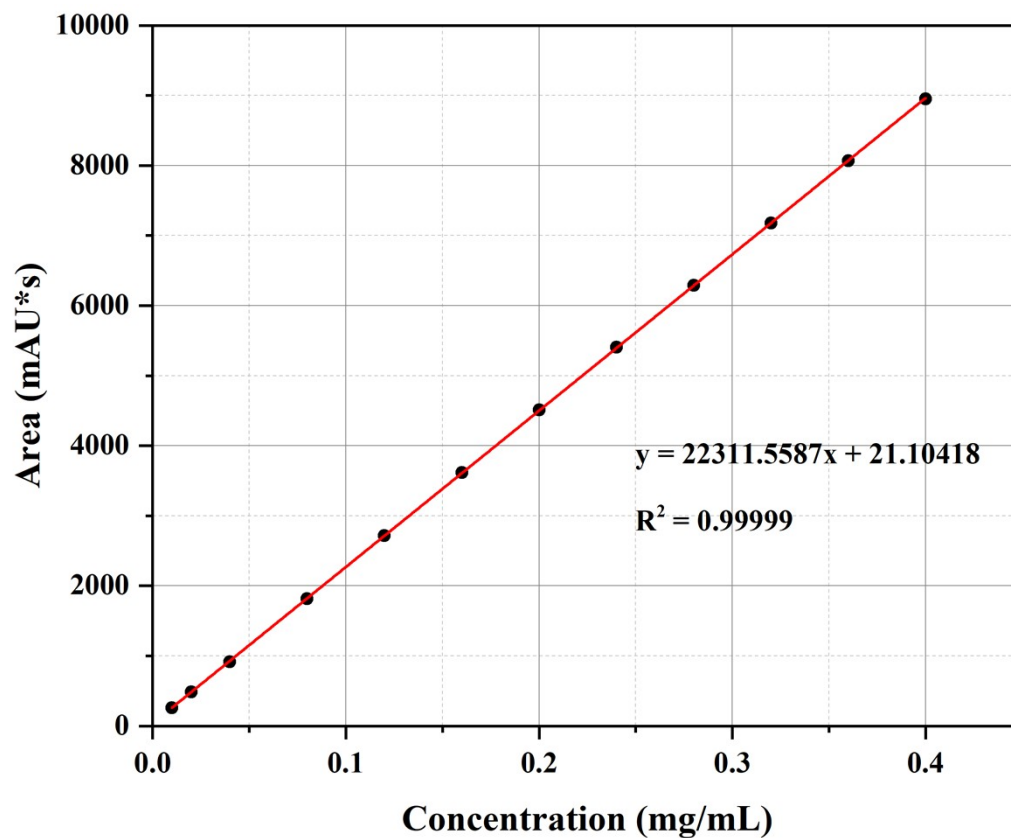

Figure S1. Standard curve of MET content (concentration-peak area) determined by HPLC.

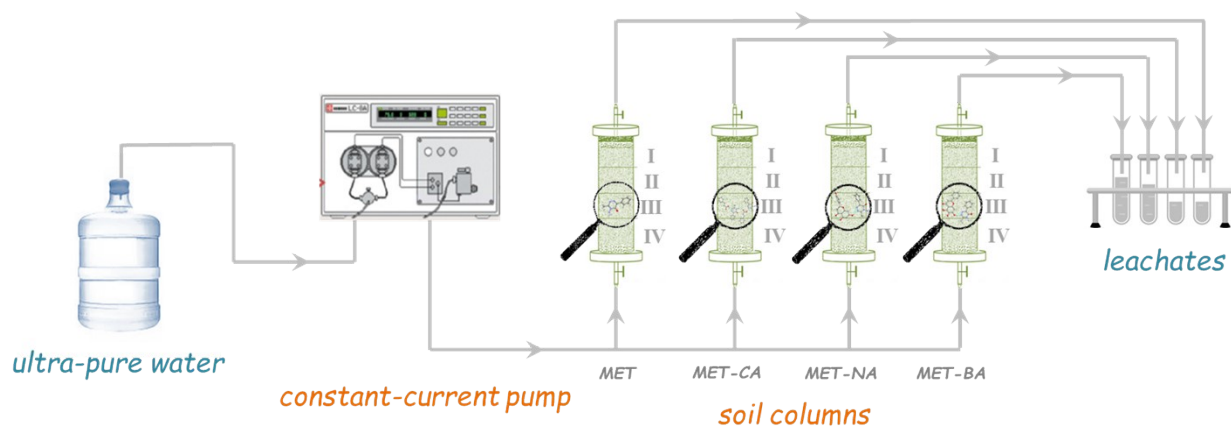

Figure S2. Schematic diagram of the soil column experiment.

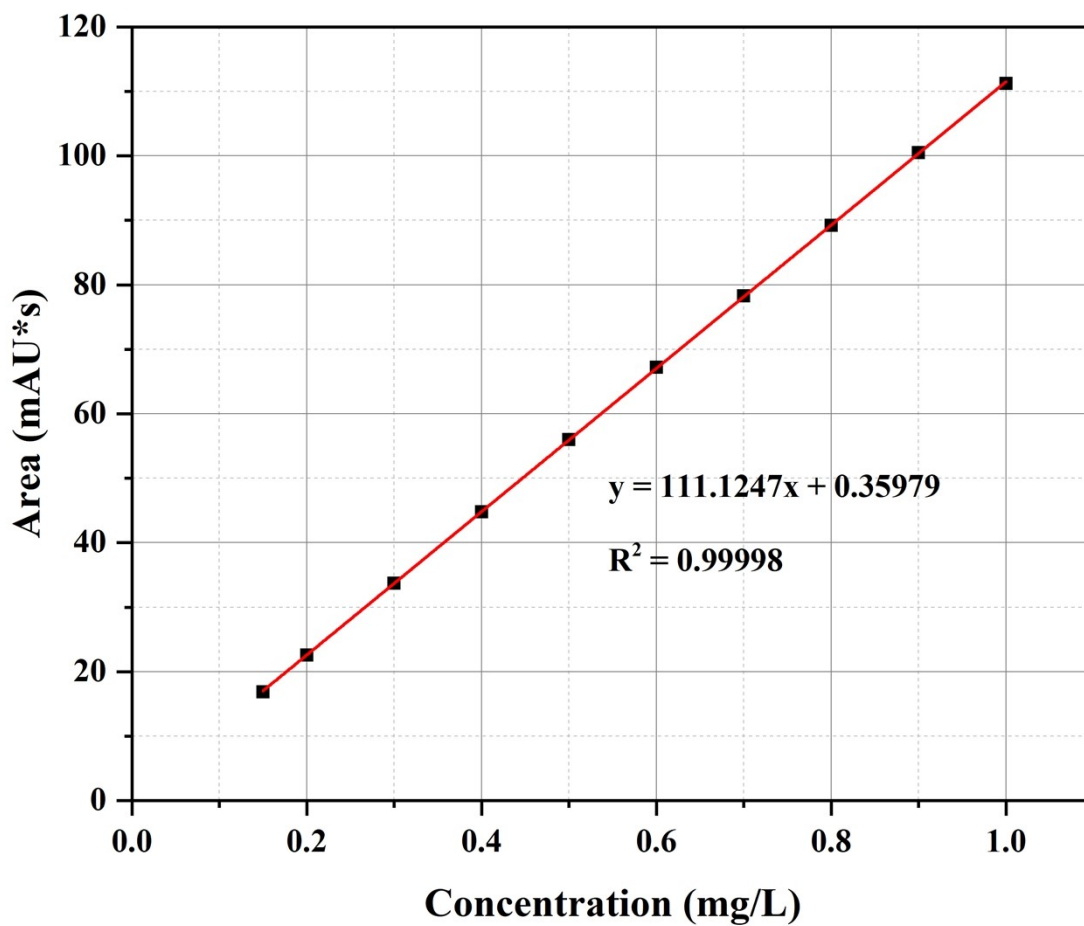

**Figure S3.** Standard curve of MET content (concentration-peak area) determined by UPLC.

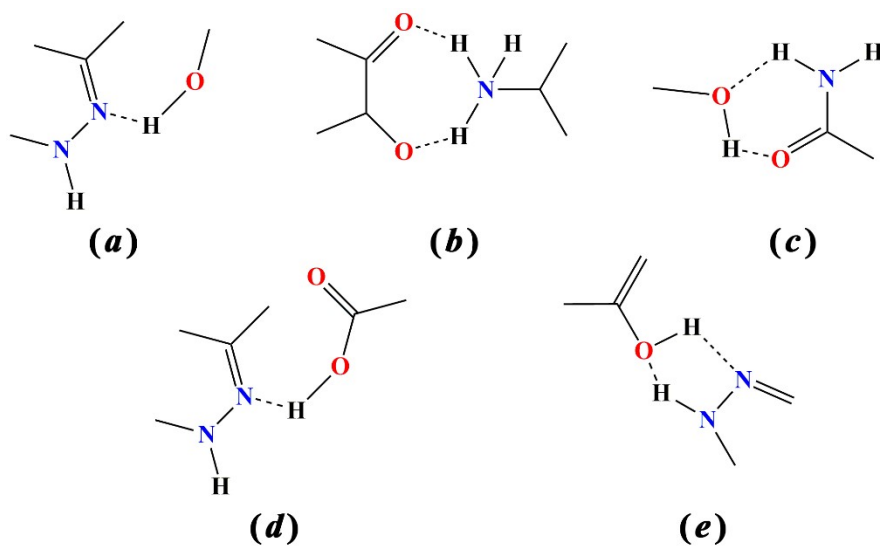

**Figure S4.** Supramolecular synthons with similar structures reported in the literature.<sup>1-9</sup>

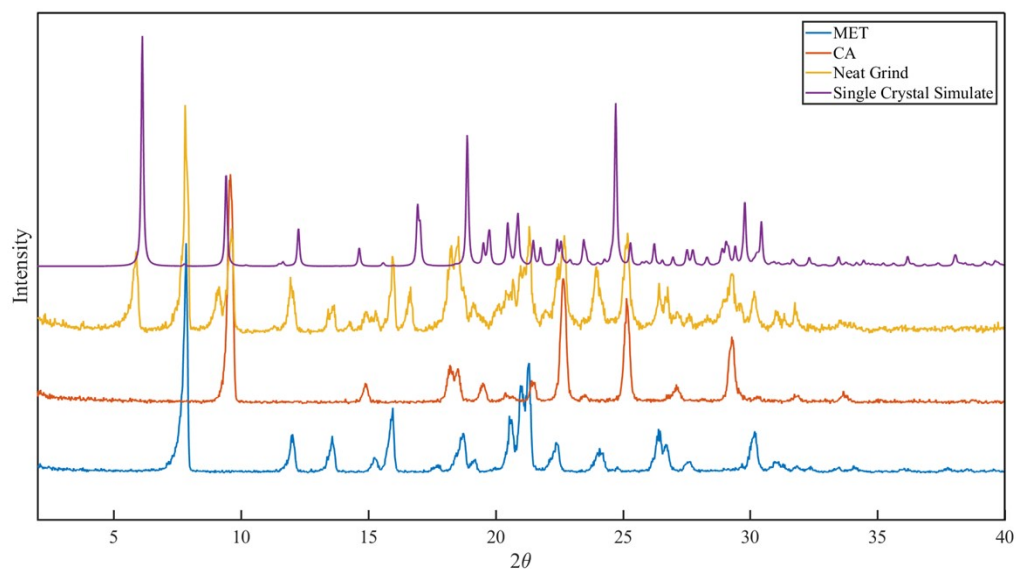

**Figure S5.** PXRD pattern of the MET-CA neat grinding product (yellow) compared with MET (blue), CA (orange) and the calculated pattern obtained from the single crystal data (purple).

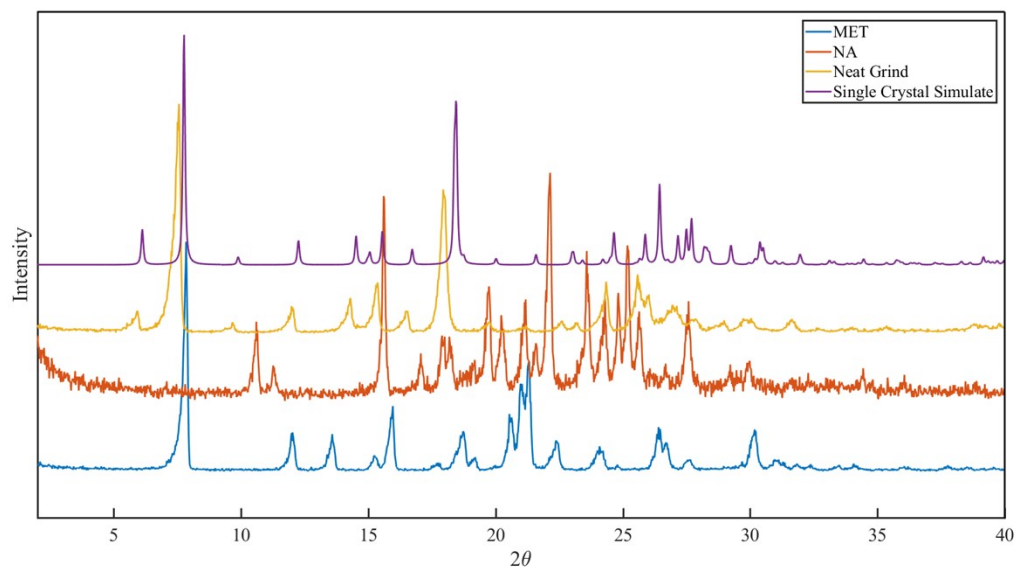

**Figure S6.** PXRD patterns of the MET-NA neat grinding product (yellow) compared with MET (blue), NA (orange) and the calculated pattern obtained from the single crystal data (purple).

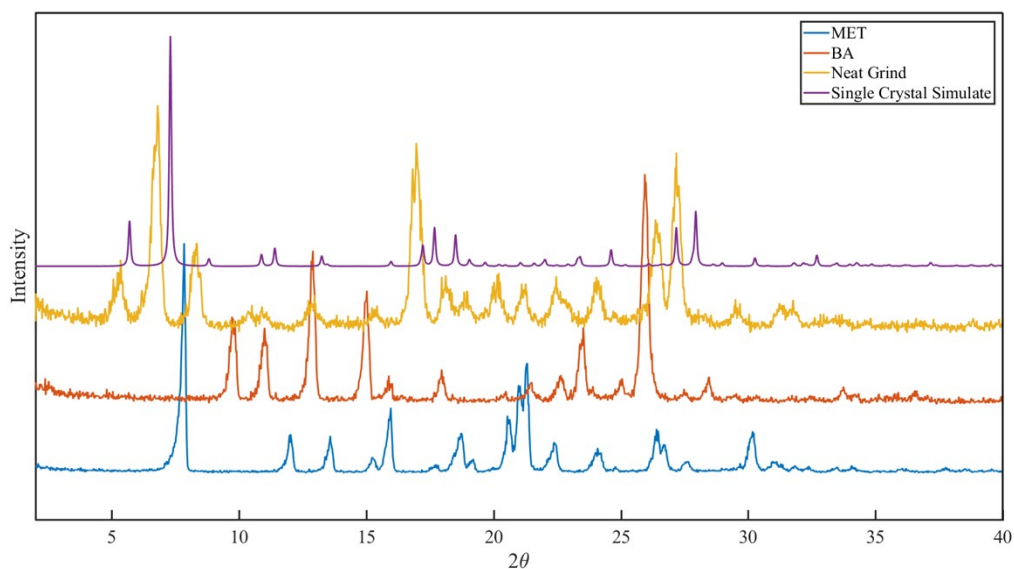

**Figure S7.** PXRD pattern of the MET-NA neat grinding product (yellow) compared with MET (blue), NA (orange) and the calculated pattern obtained from the single crystal data (purple).

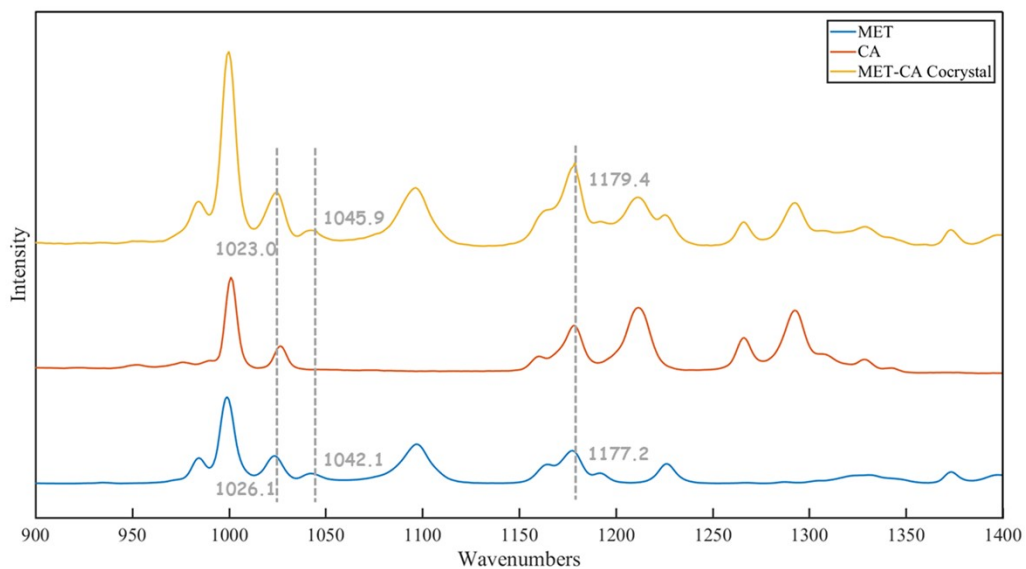

**Figure S8.** Confocal Raman micro-spectra of the MET-CA neat grinding product (yellow) compared MET (blue) and CA (orange).

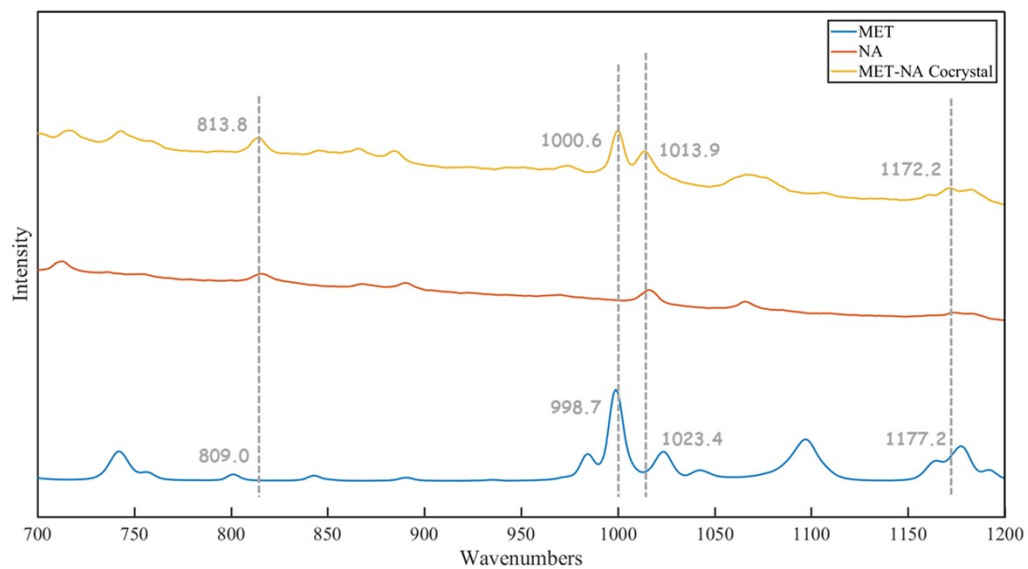

**Figure S9.** Confocal Raman micro-spectra of the MET-NA neat grinding product (yellow) compared MET (blue) and NA.

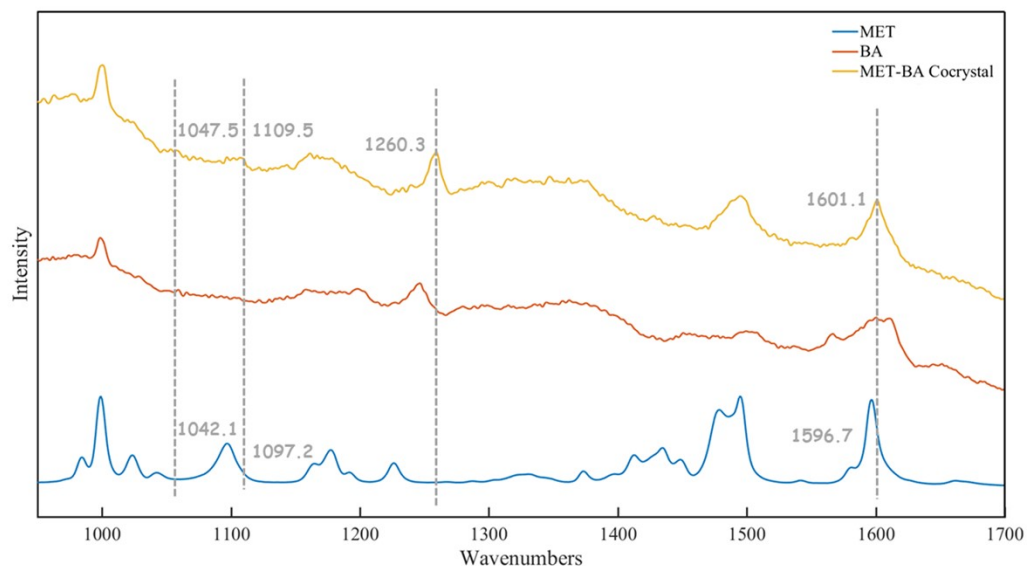

**Figure S10.** Confocal Raman micro-spectra of the MET-BA neat grinding product (yellow) compared MET (blue) and BA (orange).



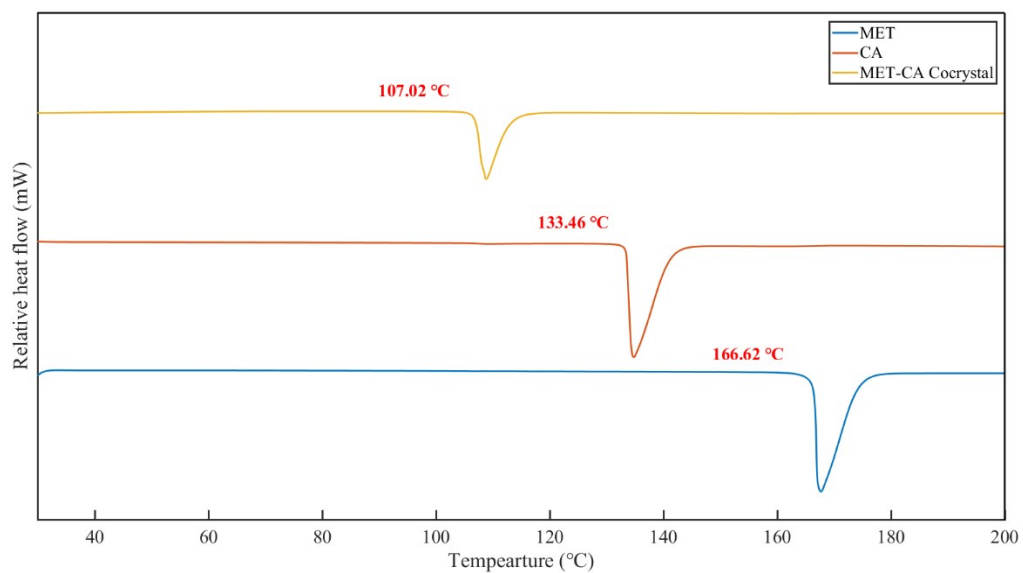

**Figure S11.** Comparison of DSC plots of MET (blue) and CA (orange) with the MET-CA cocrystal (yellow).

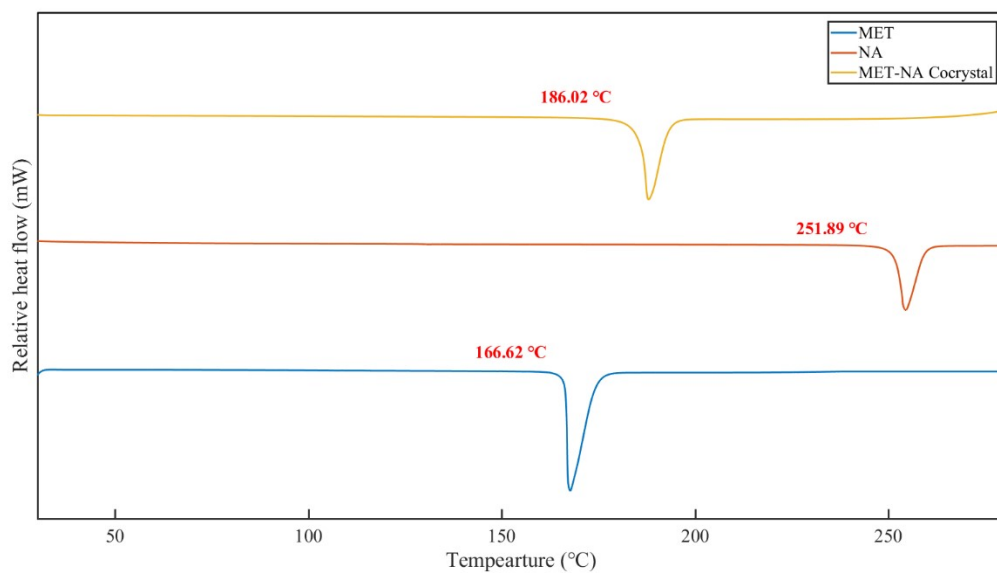

**Figure S12.** Comparison of DSC plots of MET (blue) and CA (orange) with the MET-NA cocrystal (yellow).

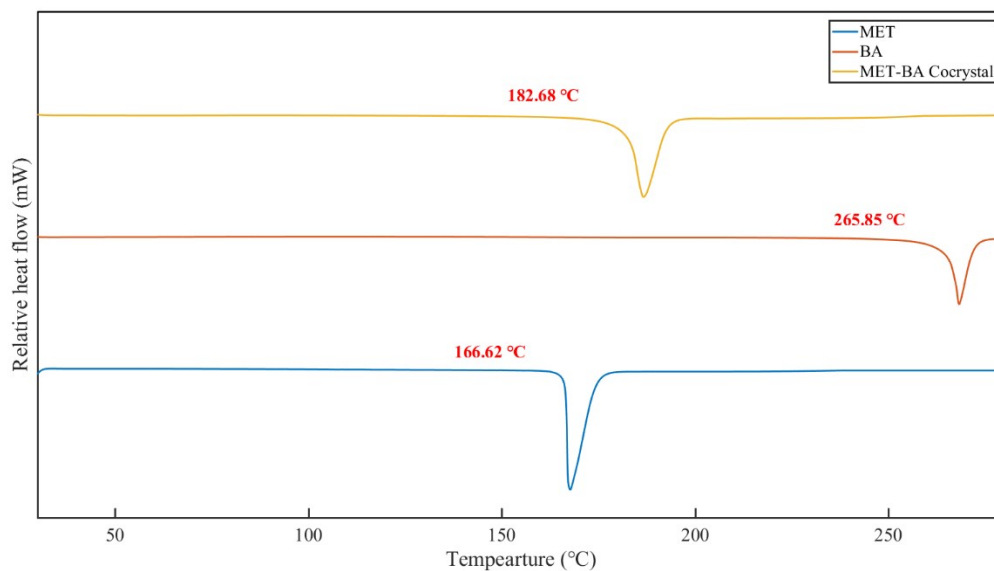

**Figure S13.** Comparison of DSC plots of MET (blue) and CA (orange) with the MET-BA cocrystal (yellow).

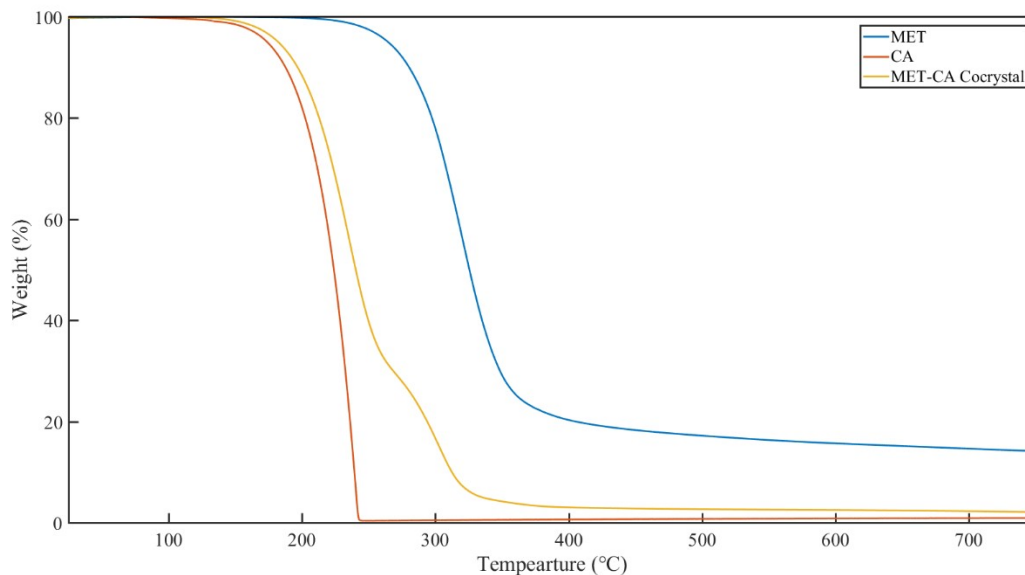

**Figure S14.** The TGA traces of MET (blue) and CA (orange) with the MET-CA cocrystal (yellow).

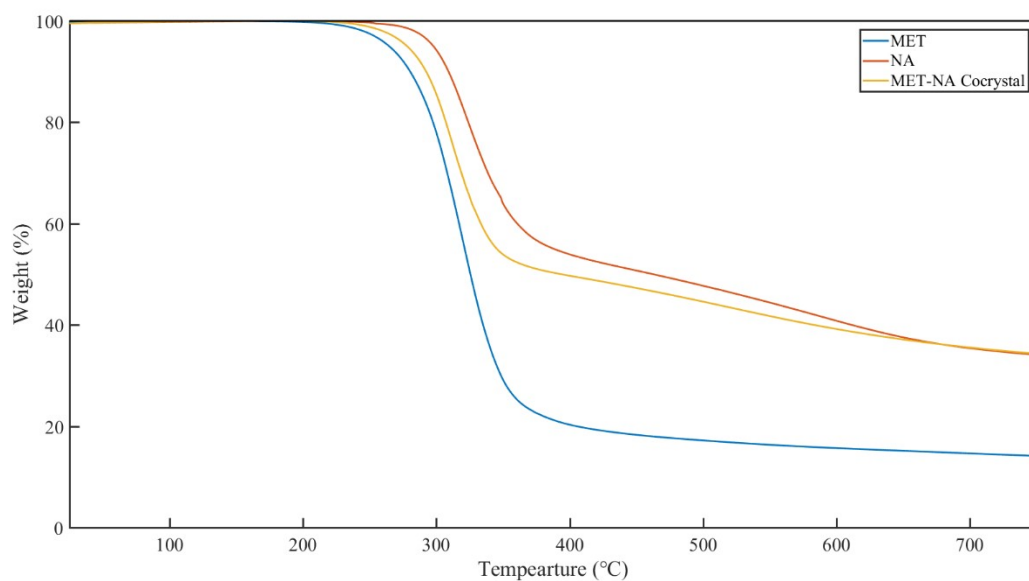

**Figure S15.** The TGA traces of MET (blue) and NA (orange) with the MET-NA cocrystal (yellow).

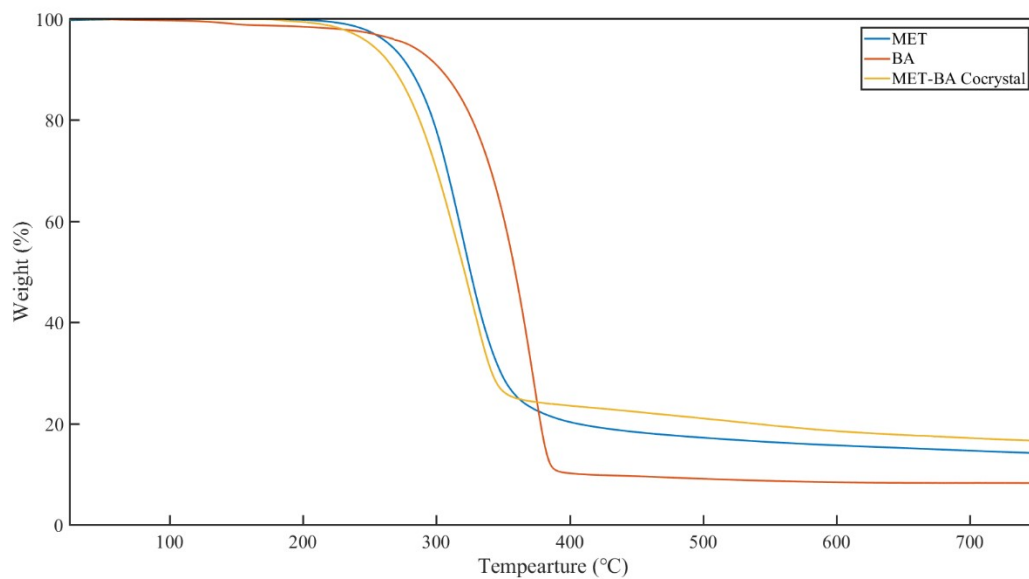

**Figure S16.** The TGA traces of MET (blue) and BA (orange) with the MET-BA cocrystal (yellow).

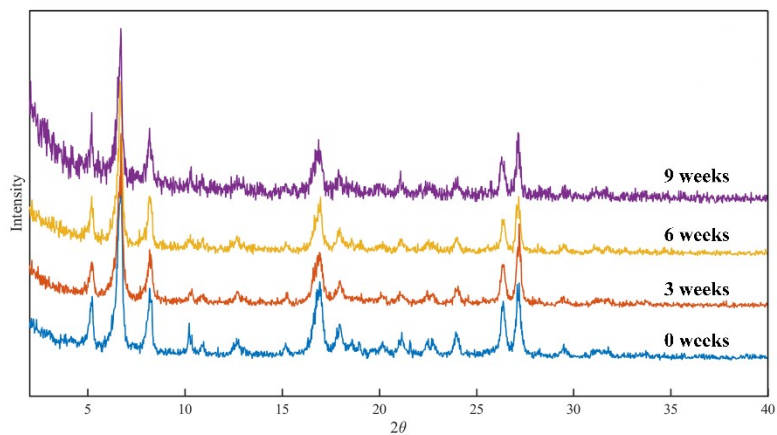

(a)

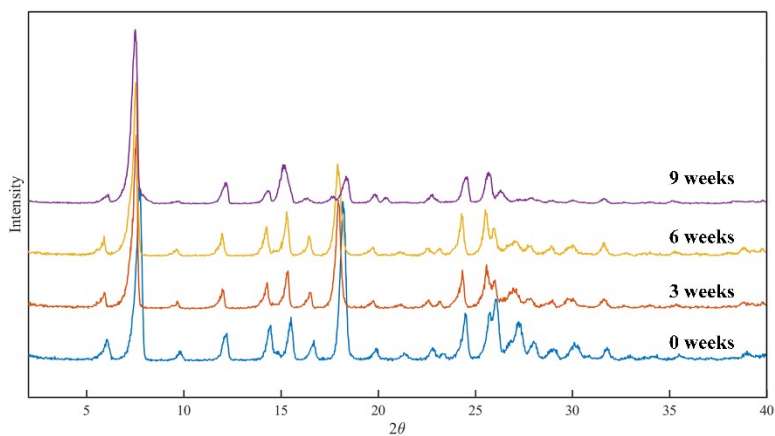

(b)

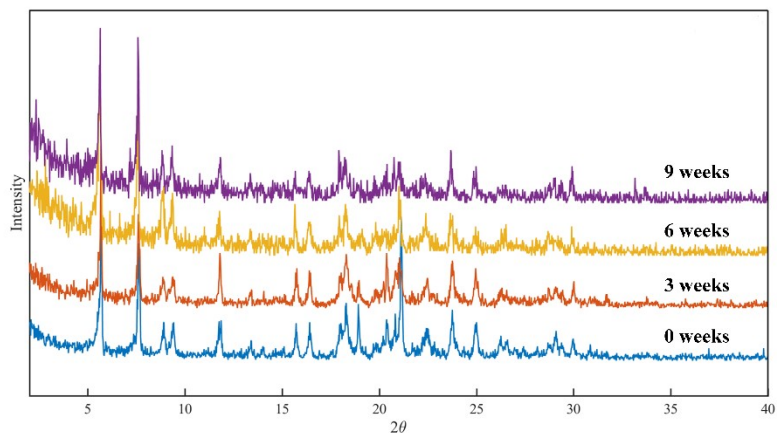

(c)

**Figure S17.** PXR D patterns of all cocrystals under accelerated storage conditions (40 °C, 75% RH) over 9 weeks. (a) MET-CA, (b) MET-NA, and (c) MET-BA.

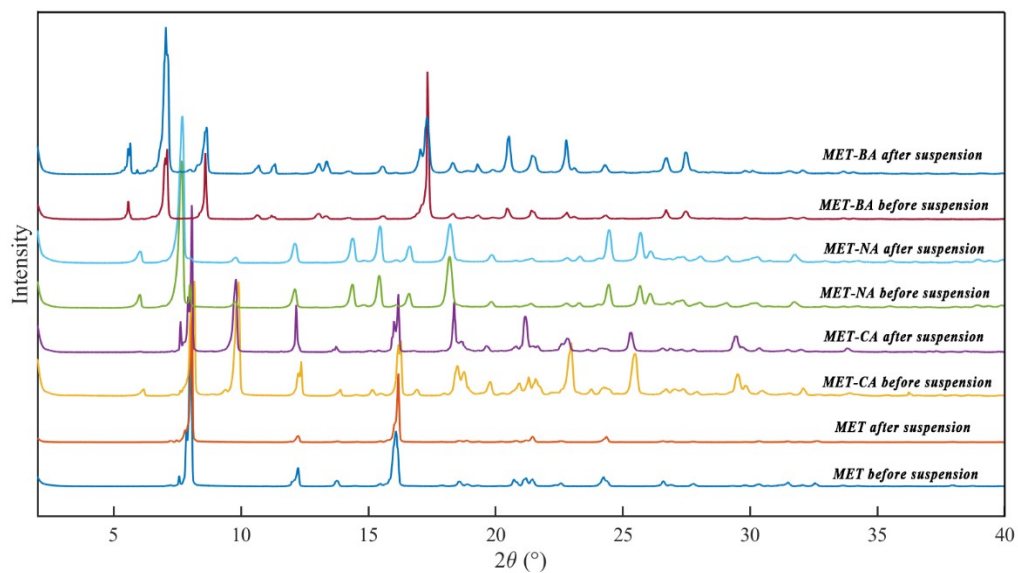

**Figure S18.** PXR D patterns of MET and cocrystals after 48 h suspension in water at 25 °C.

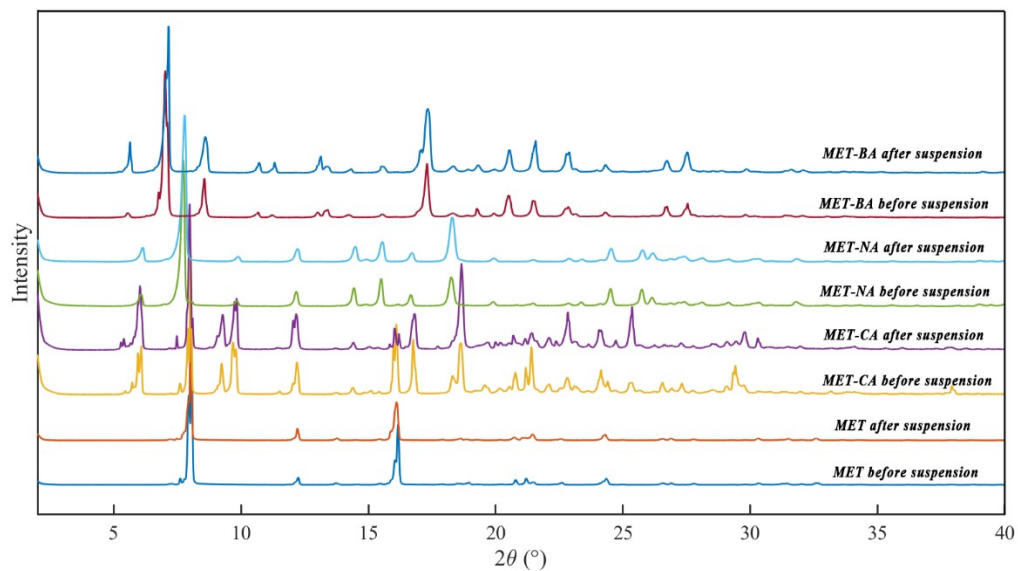

**Figure S19.** PXR D patterns of MET and cocrystals after 48 h suspension in water at 35 °C.

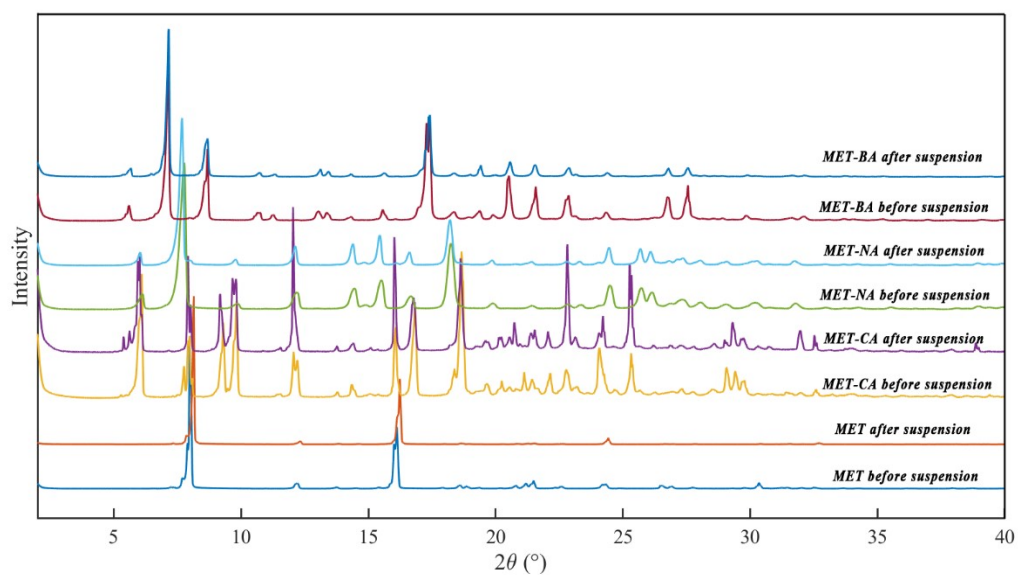

**Figure S20.** PXR D patterns of MET and cocrystals after 48 h suspension in water at 45 °C.

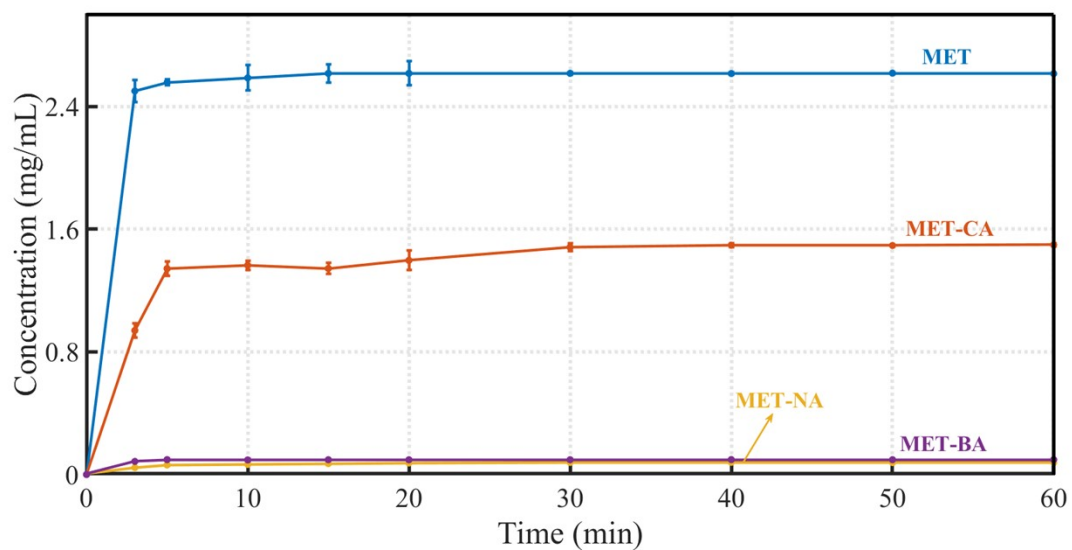

**Figure S21.** Dissolution profiles of MET, and three cocrystals in water at 35 °C.

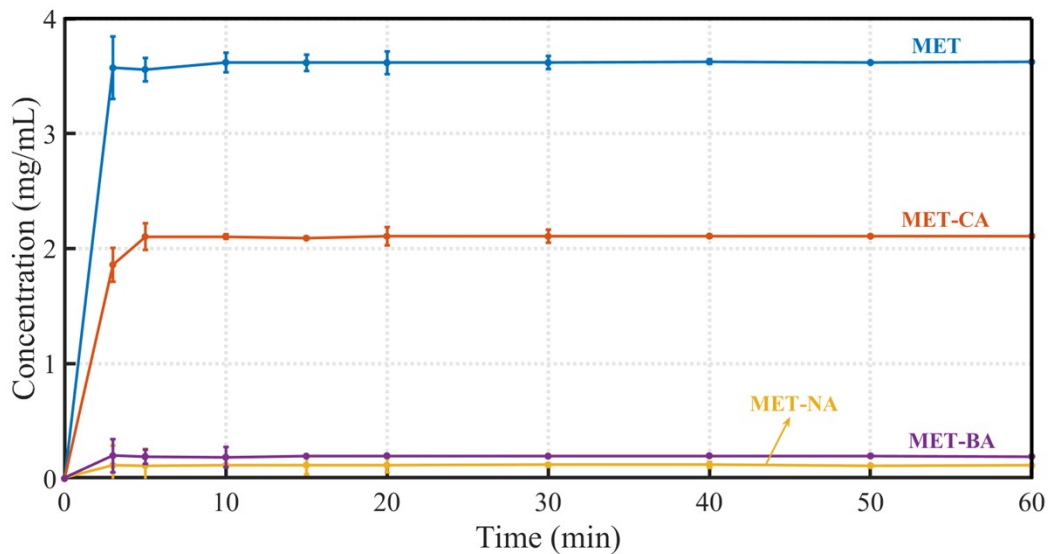

**Figure S22.** Dissolution profiles of MET, and three cocrystals in water at 45 °C.

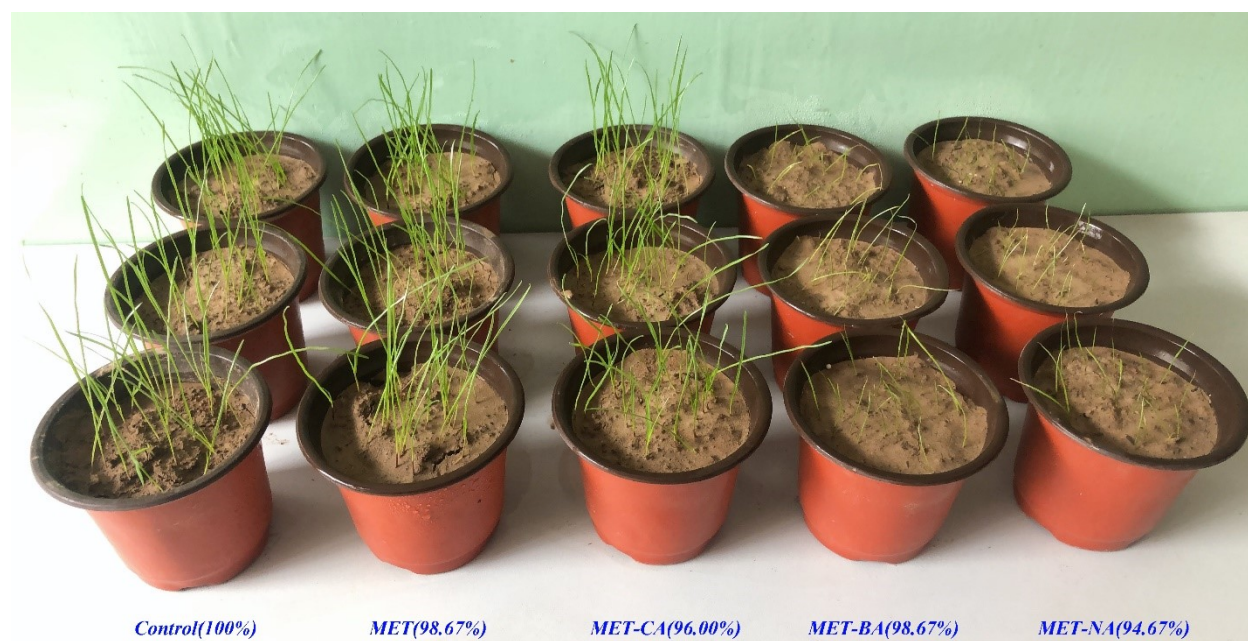

**Figure S23.** Morphological pictures of Kentucky bluegrass after 14 days of different treatments (data represent germination rate: Control, 100%; MET, 98.67%; MET-CA, 96.00%; MET-BA, 98.67%; MET-NA, 94.67%).





## References:

- 1 Y. Yang, W. Tang, S. Liu, D. Han, Y. Liu and J. Gong, *J. Mol. Liq.*, 2017, 243, 472-483.
- 2 J. Sui, Y. Luo, J. Zhai, F. Fan, L. Zhang, J. Lu and X. Zhu, *J. Mol. Liq.*, 2020, 304, 112723.
- 3 D. Wu, J. Li, Y. Xiao, X. Ji, C. Li, B. Zhang, B. Hou, L. Zhou, C. Xie and J. Gong, *Cryst. Growth Des.*, 2021, 21, 2371-2388.
- 4 K. Suresh, V. S. Minkov, K. K. Namila, E. Derevyannikova, E. Losev, A. Nangia and E. V. Boldyreva, *Cryst. Growth Des.*, 2015, 15, 3498-3510.
- 5 Y. Yuan, D. Li, C. Wang, S. Chen, M. Kong, Z. Deng, C. C. Sun and H. Zhang, *Cryst. Growth Des.*, 2019, 19, 7185-7192.
- 6 J.-M. Chen, S. Li and T.-B. Lu, *Cryst. Growth Des.*, 2014, 14, 6399-6408.
- 7 M. Yoshimura, M. Miyake, T. Kawato, M. Bando, M. Toda, Y. Kato, T. Fukami and T. Ozeki, *Cryst. Growth Des.*, 2017, 17, 550-557.
- 8 J. Kastelic, Z. Hodnik, P. Sket, J. Plavec, N. Lah, I. Leban, M. Pajk, O. Planinsek and D. Kikelj, *Cryst. Growth Des.*, 2010, 10, 4943-4953.
- 9 B. C. Dayo Owoyemi, C. C. da Silva, M. S. Souza, L. F. Diniz, J. Ellena and R. L. Carneiro, *Cryst. Growth Des.*, 2019, 19, 648-657.
